# Supplementary material for: <em>In Vitro</em> Fermentation of Carrot Juice by the Human Gut Microbiota: Potential Use of It as A Novel Prebiotic Agent
Source: Preprints.org preprint supplement (doi:10.20944/preprints202209.0488.v1), 2022-09-30
Supplement: Supplementary file 4 [file supplementary]

**Table S1 The *α*−diversity analysis of the gut microbiota**

| Group | Observed species | Chao1 index | Ace index | Shannon index | Simpson index |
| --- | --- | --- | --- | --- | --- |
| H | 53 ± 25 | 69 ± 30 | 76 ± 29 | 1.15 ± 0.26 | 0.47 ± 0.12 |
| G | 42 ± 13 | 63 ± 38 | 85 ± 79 | 1.09 ± 0.50 | 0.48 ± 0.20 |

Data are expressed as mean ± SEM. * *P* < 0.05; ** *P* < 0.01.
